# Supplementary material for: Highland barley β-glucan alleviated western diet-induced non-alcoholic fatty liver disease via increasing energy expenditure and regulating bile acid metabolism in mice
Source: Royal Society of Chemistry journal article supplement (doi:10.1039/d2fo01167k), 2022-01-01
Supplement: d2fo01167k1.pdf [file d2fo01167k1.pdf]

Supplementation Table 1 Primer sequences used for semi-quantitative RT-PCR analysis

| <b>Gene</b>    | <b>Forward primer (5'→3')</b> | <b>Reverse primer (5'→3')</b> |
|----------------|-------------------------------|-------------------------------|
| FXR            | CCCCTGCTTGATGTGCTAC           | CGTGGTGATGGTTGAATGTC          |
| FGF15          | TGTTTCACCGCTCCTTCTTT          | TCTACATCCTCCACCATCCTG         |
| SHP            | TCTGCAGGTCGTCCGACTATTC        | AGGCAGTGGCTGTGAGATGC          |
| CYP7A1         | CTGGGCTGTGCTCTGAAGT           | GGGAGTTTGTGATGAAGTGGA         |
| FGFR4          | GCATCTTTCAGGGGACACCA          | TTGTACCAGTGACGACCACG          |
| UCP1           | GTGAACCCGACAACCTCCGAA         | TGAAACTCCGGCTGAGAAGAT         |
| CITED1         | GGGGTAAAAGATCGCAAGGC          | TGGTAGAAGGGGTGGCAGTA          |
| TFAM           | GCACCACATTCTCCAAAGGT          | GTCCATAGGCACCGTATTGC          |
| NRF1           | CAACAGGGAAGAAACGAAA           | GCACCACATTCTCCAAAGGT          |
| Prdm16         | CAGCACGGTGAAGCCATT            | GCGTGCATCCGCTTGTG             |
| PGC-1 $\alpha$ | GAAGTGGTGTAGCGACCAATC         | AATGAGGGCAATCCGTCTTCA         |
| TMEM26         | GAAACCAGTATTGCAGCACCC         | CCAGACCGGTTACATACCA           |
| $\beta$ -actin | GGACTGTTACTGAGCTGCGTT         | CGCCTTCACCGTTCAGTT            |

Supplementation Table 2 Primary antibodies used in Western blotting.

| <b>Gene</b> | <b>Forward primer (5'→3')</b> | <b>Dilution</b> |
|-------------|-------------------------------|-----------------|
| CYP7A1      | BOSTER (PB0578)               | 1:1000          |
| CYP8B1      | BOSTER (AY1907)               | 1:1000          |
| CYP27A1     | BOSTER (M02121-1)             | 1:1000          |
| FXR         | Abcam (ab85606)               | 1:1000          |
| FGF15       | Abcam (ab229630)              | 1:1000          |
| TGR5        | BOSTER (A01958-1)             | 1:1000          |
| UCP-1       | Wanleibio (WL02625)           | 1:2000          |
| GAPDH       | Abways (AB0036)               | 1:5000          |
