# Supplementary material for: Highland barley β-glucan alleviated western diet-induced non-alcoholic fatty liver disease via increasing energy expenditure and regulating bile acid metabolism in mice
Source: Royal Society of Chemistry journal article supplement (doi:10.1039/d2fo01167k), 2022-01-01
Supplement: d2fo01167k2.pdf [file d2fo01167k2.pdf]

Supplementation Table 2 Primary antibodies used in Western blotting.

| <b>Protein</b> | <b>Brand</b>        | <b>Dilution</b> |
|----------------|---------------------|-----------------|
| CYP7A1         | BOSTER (PB0578)     | 1:1000          |
| CYP8B1         | BOSTER (AY1907)     | 1:1000          |
| CYP27A1        | BOSTER (M02121-1)   | 1:1000          |
| FXR            | Abcam (ab85606)     | 1:1000          |
| FGF15          | Abcam (ab229630)    | 1:1000          |
| TGR5           | BOSTER (A01958-1)   | 1:1000          |
| UCP-1          | Wanleibio (WL02625) | 1:2000          |
| GAPDH          | Abways (AB0036)     | 1:5000          |
